# Supplementary material for: The relative importance of antecedent soil moisture and precipitation in flood generation in the middle and lower Yangtze River basin
Source: Copernicus journal article supplement (doi:10.5194/hess-2021-531), 2021-11-23
Supplement: Supplementary file 1 [file hess-2021-531-supplement-version1.pdf]

---

## Supplementary

**Table S1:** Estimated concentration time for 10 sites with largest drainage area: the ones on main stream (MS) and the ones at the outlets of major tributaries (TR).

| Site Name      | Concentration Time (hr) | Drainage Area (km <sup>2</sup> ) |
|----------------|-------------------------|----------------------------------|
| TR-Hukou       | 17.9                    | 161,979                          |
| TR-Chenglingji | 18.8                    | 261,986                          |
| MS-Zhutuo      | 32.7                    | 668,661                          |
| MS-Cuntan      | 32.8                    | 827,799                          |
| MS-Wanxian     | 37.6                    | 948,524                          |
| MS-Yichang     | 41.5                    | 982,948                          |
| MS-Jianli      | 45.2                    | 1,014,690                        |
| MS-Luoshan     | 46.3                    | 1,276,676                        |
| MS-Hankou      | 51.0                    | 1,432,008                        |
| MS-Datong      | 54.3                    | 1,657,604                        |

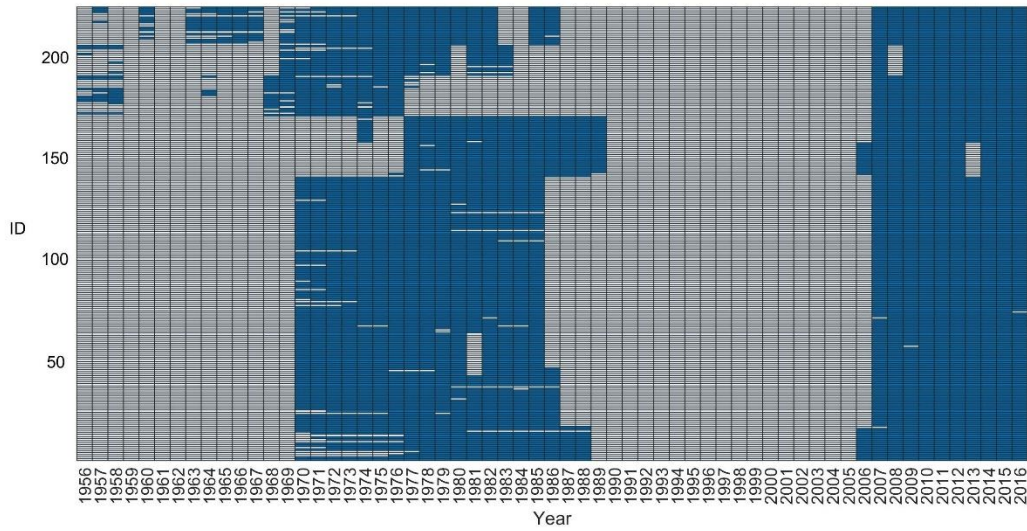

10  
11  
12  
13

**Figure S1:** The data availability of each station, each column indicates each year while each row is corresponding to each station, blue grid indicates there is record of this year.

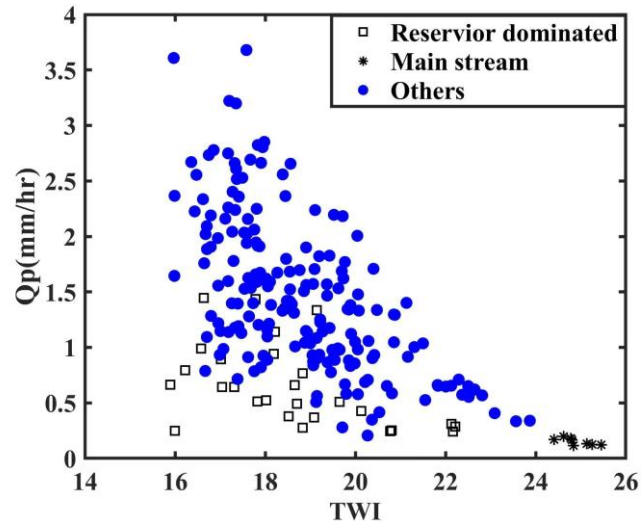

14

15 **Figure S2:** Scatterplot between the topographic wetness index (TWI) and area weighted  
16 annual maximum discharge ( $Q_p$ ).

17
